# Supplementary material for: Mixed sandwich thorium complexes incorporating bis(tri-isopropylsilyl)cyclooctatetraenyl and pentamethylcyclopentadienyl ligands: synthesis, structure and reactivity
Source: Royal Society of Chemistry journal article supplement (doi:10.1039/c4dt02362e), 2014-10-20
Supplement: c4dt02362e1.pdf [file c4dt02362e1.pdf]

# Mixed Sandwich Thorium Complexes Incorporating Bis(tri-*isopropylsilyl*)cyclooctatetraenyl and Pentamethylcyclopentadienyl Ligands: Synthesis, Structure and Reactivity

Z. E. Button, J. A. Higgins, M. Suvova, F. G. N. Cloke\*, S. M. Roe

\* [f.g.cloke@sussex.ac.uk](mailto:f.g.cloke@sussex.ac.uk)

Department of Chemistry, School of Life Sciences, University of Sussex, Brighton,  
BN1 9QJ, UK.

## Electronic Supporting Information

### Contents

|                                                                        |       |
|------------------------------------------------------------------------|-------|
| Selected views of the molecular structure of <b>3</b> (Figure S1, S2). | S1    |
| Unrefined molecular structure of <b>6</b> (Figure S3).                 | S2    |
| Crystal data for <b>1-5</b> , <b>8</b> (Table S1, S2).                 | S3-S4 |
| Cyclic voltammograms of <b>1</b> and <b>2</b> (Figure S4).             | S4    |

### Selected views of the molecular structure of **3**

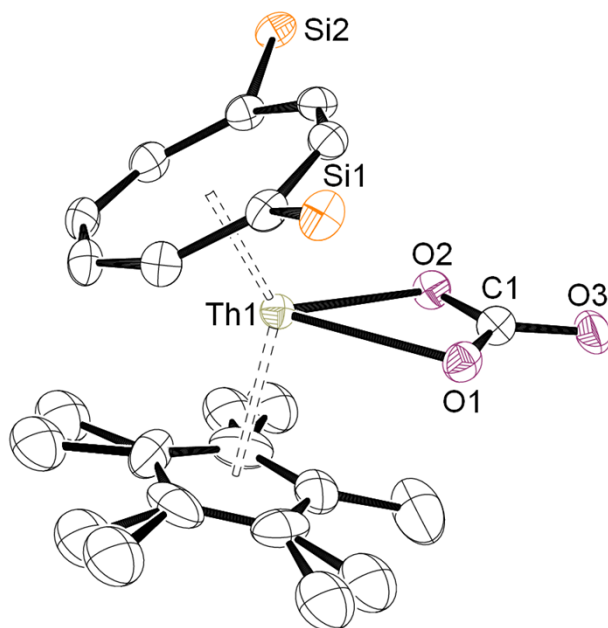

**Figure S1.** ORTEP representation of the asymmetric unit of **3**, showing modelling of carbonate ligand.

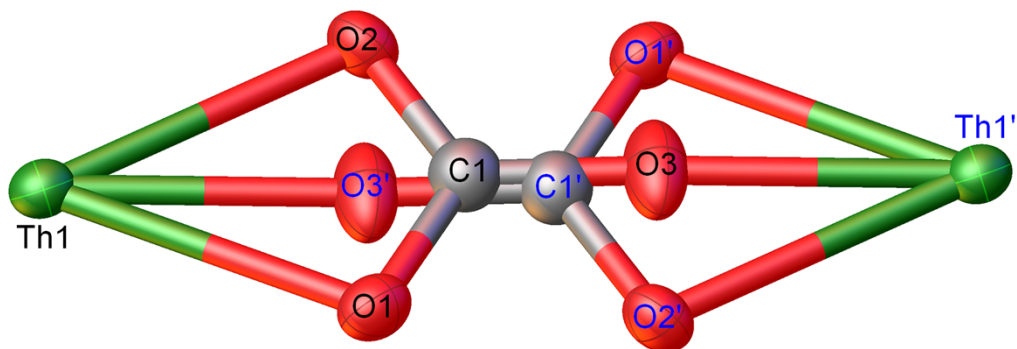

**Figure S2.** OLEX2-generated graphic of the grown structure of **3**, showing only overlapping 50:50 occupancy core: label colours black and blue represent asymmetric unit and symmetry-generated molecule respectively.

### Unrefined molecular structure of 6

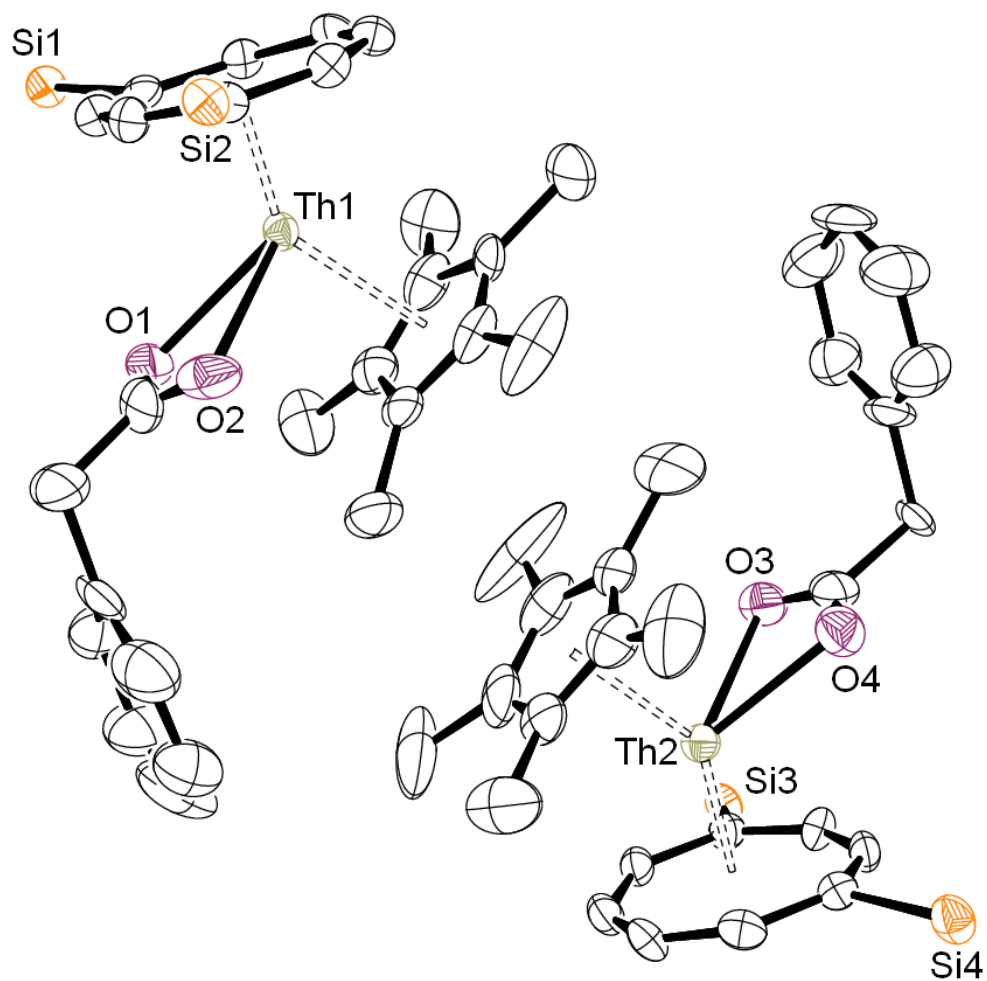

**Figure S3.** ORTEP representation of the molecular structure of **6**. Refinement not complete; residual electron density also observed above the COT ring, thought to be a result of poor-quality twinned crystals for which a sufficient model could not be found.

**Table S1.** Crystal data and structure refinement details for **1-4**.

|                                                    | <b>1</b>                                                                               | <b>2</b>                                            | <b>3</b>                                                                                               | <b>4</b>                                                                        |
|----------------------------------------------------|----------------------------------------------------------------------------------------|-----------------------------------------------------|--------------------------------------------------------------------------------------------------------|---------------------------------------------------------------------------------|
| Formula                                            | C <sub>36</sub> H <sub>63</sub> Si <sub>2</sub> ClTh.(C <sub>6</sub> H <sub>12</sub> ) | C <sub>36</sub> H <sub>63</sub> Si <sub>2</sub> ITh | C <sub>36.5</sub> H <sub>63</sub> O <sub>1.5</sub> Si <sub>2</sub> Th.(C <sub>7</sub> H <sub>8</sub> ) | C <sub>88</sub> H <sub>142</sub> O <sub>4</sub> Si <sub>4</sub> Th <sub>2</sub> |
| FW                                                 | 903.69                                                                                 | 910.98                                              | 906.22                                                                                                 | 1840.46                                                                         |
| Crystal system                                     | Triclinic                                                                              | Triclinic                                           | Triclinic                                                                                              | Triclinic                                                                       |
| Space group                                        | P -1                                                                                   | P -1                                                | P -1                                                                                                   | P -1                                                                            |
| a/Å                                                | 8.67790(1)                                                                             | 8.7050(4)                                           | 12.283(3)                                                                                              | 12.3722(5)                                                                      |
| b/Å                                                | 12.8594(2)                                                                             | 12.5835(6)                                          | 13.356(3)                                                                                              | 13.3983(4)                                                                      |
| c/Å                                                | 20.8423(4)                                                                             | 18.1400(8)                                          | 15.689(3)                                                                                              | 15.7276(7)                                                                      |
| α/°                                                | 92.8860(10)                                                                            | 89.126(2)                                           | 65.93(3)                                                                                               | 65.525(2)                                                                       |
| β/°                                                | 99.1770(10)                                                                            | 83.109(2)                                           | 67.92(3)                                                                                               | 67.618(2)                                                                       |
| γ/°                                                | 109.519(2)                                                                             | 71.906(3)                                           | 72.30(3)                                                                                               | 72.722(2)                                                                       |
| V/Å <sup>3</sup>                                   | 2150.66(6)                                                                             | 1874.63(15)                                         | 2142.8(11)                                                                                             | 2163.84(15)                                                                     |
| Z                                                  | 2                                                                                      | 2                                                   | 2                                                                                                      | 1                                                                               |
| Crystal size/mm <sup>3</sup>                       | 0.2 x 0.04 x 0.04                                                                      | 0.36 x 0.22 x 0.06                                  | 0.16 x 0.08 x 0.06                                                                                     | 0.04 x 0.02 x 0.02                                                              |
| θ range/°                                          | 3.42 – 27.06                                                                           | 3.15 – 27.53                                        | 3.396 - 27.880                                                                                         | 2.61 – 27.54                                                                    |
| Completeness                                       | 97.9                                                                                   | 99.5                                                | 98.6                                                                                                   | 98.3                                                                            |
| Reflections collected, <i>R</i> (int)              | 26587, 0.0673                                                                          | 35632, 0.057                                        | 31500, 0.0581                                                                                          | 28262, 0.0534                                                                   |
| Independent reflections                            | 9259                                                                                   | 8609                                                | 9765                                                                                                   | 9819                                                                            |
| Final <i>R</i> indices [ <i>I</i> >2σ( <i>I</i> )] | R1 = 0.0465<br>wR2 = 0.0992                                                            | R1 = 0.041<br>wR2 = 0.098                           | R1 = 0.0277<br>wR2 = 0.0605                                                                            | R1 = 0.0346<br>wR2 = 0.0667                                                     |
| <i>R</i> indices (all data)                        | R1 = 0.0628<br>wR2 = 0.1055                                                            | R1 = 0.053<br>wR2 = 0.103                           | R1 = 0.0329<br>wR2 = 0.0624                                                                            | R1 = 0.0476<br>wR2 = 0.0707                                                     |

**Table S2.** Crystal data and structure refinement details for **5** and **8**.

|                                                     | <b>5</b>                                           | <b>8</b>                                                                        |
|-----------------------------------------------------|----------------------------------------------------|---------------------------------------------------------------------------------|
| Formula                                             | C <sub>43</sub> H <sub>70</sub> Si <sub>2</sub> Th | C <sub>74</sub> H <sub>128</sub> Si <sub>4</sub> O <sub>4</sub> Th <sub>2</sub> |
| FW                                                  | 875.21                                             | 1904.23                                                                         |
| Crystal system                                      | Triclinic                                          | Triclinic                                                                       |
| Space group                                         | P -1                                               | P -1                                                                            |
| a/Å                                                 | 13.0170(2)                                         | 11.9293(4)                                                                      |
| b/Å                                                 | 17.3983(3)                                         | 13.9229(6)                                                                      |
| c/Å                                                 | 20.0305(3)                                         | 14.3584(5)                                                                      |
| α/°                                                 | 82.3334(9)                                         | 95.881(3)                                                                       |
| β/°                                                 | 75.2024(9)                                         | 113.241(3)                                                                      |
| γ/°                                                 | 69.8092(7)                                         | 113.851(3)                                                                      |
| V/Å <sup>3</sup>                                    | 4111.27(12)                                        | 1904.24(14)                                                                     |
| Z                                                   | 4                                                  | 1                                                                               |
| Crystal size/mm <sup>3</sup>                        | 0.14 x 0.08 x 0.06                                 | 0.2 x 0.1 x 0.04                                                                |
| θ range/°                                           | 2.106 – 27.47                                      | 2.68 – 26.32                                                                    |
| Completeness                                        | 99.2                                               | 99.8                                                                            |
| Reflections collected, <i>R</i> (int)               | 70490, 0.0603                                      | 14686, 0.0379                                                                   |
| Independent reflections                             | 18670                                              | 6696                                                                            |
| Final <i>R</i> indices [ <i>I</i> > 2σ( <i>I</i> )] | <i>R</i> 1 = 0.0339<br>w <i>R</i> 2 = 0.0580       | <i>R</i> 1 = 0.0376<br>w <i>R</i> 2 = 0.0852                                    |
| <i>R</i> indices (all data)                         | <i>R</i> 1 = 0.0677<br>w <i>R</i> 2 = 0.0869       | <i>R</i> 1 = 0.0508<br>w <i>R</i> 2 = 0.0907                                    |

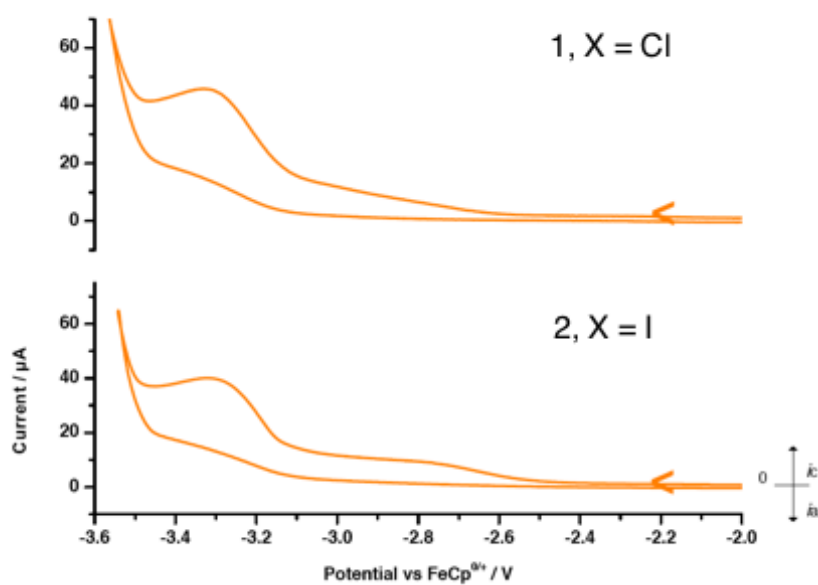**Figure S4:** Cyclic voltammograms of **1** (7.70 mM) and **2** (5.27 mM) in THF containing 0.1 M [N<sup>n</sup>Bu<sub>4</sub>][PF<sub>6</sub>]. The scan rate was 100 mV.s<sup>-1</sup>.
